# Supplementary material for: Geographic Inequalities of Respiratory Health Services Utilization during Childhood in Edmonton and Calgary, Canada: A Tale of Two Cities
Source: PubMed Central journal article supplement (PMC7730300; doi:10.3390/ijerph17238973), 2020-12-02
Supplement: ijerph-17-08973-s001.pdf [file ijerph-17-08973-s001.pdf]

## Supplementary Materials

### Manuscript: Geographic inequalities of respiratory health services utilization during childhood in Edmonton and Calgary, Canada: a tale of two cities

Jesus Serrano-Lomelin, Charlene Nielsen, Anne Hicks, Susan Crawford, Jeffrey Bakal, and Maria B. Ospina.

#### Section S1. Standardized Prevalence Ratios (SPR) & smoothed SPR

Respiratory events = number of respiratory health service utilization (hospitalizations + ED visits) associated with a primary diagnosis of acute bronchiolitis, asthma, croup, influenza, pneumonia, other acute lower respiratory tract infections, and/or other acute upper respiratory tract infections.

SPR = Standardized Prevalence Ratio applying the indirect standardization method

Smoothed SPR = smoothed SPR

$Y_{DA}$  = respiratory events by DA

Overall rate of  $Y$  for Alberta = 1.36

*Expected*  $Y_{DA}$  = number of live births \* 1.36

$SPR = Y_{DA} / \textit{Expected } Y_{DA}$

The smoothed SPR were obtained from empirical Bayes predictions using the Stata programs (commands) developed by Rabe-Hesketh and Skrondal, 2008. Details in: Rabe-Hesketh, S., Skrondal, A., 2008. Multilevel and longitudinal modeling using Stata. 2nd ed. Stata Press, Texas.

Commands:

```
*** random-intercept (at DA level) Poisson regression ***
```

```
gllamm Sum_TotEvents, i(DAUID_2006) offset (lne) family (poisson) link(log) adapt
```

```
*** empirical Bayes predictions using gllapred command with "mu" option to get posterior means ***  
gllapred mu, mu nooffset
```

Distribution of SPR and smoothed SPR by DA for Alberta

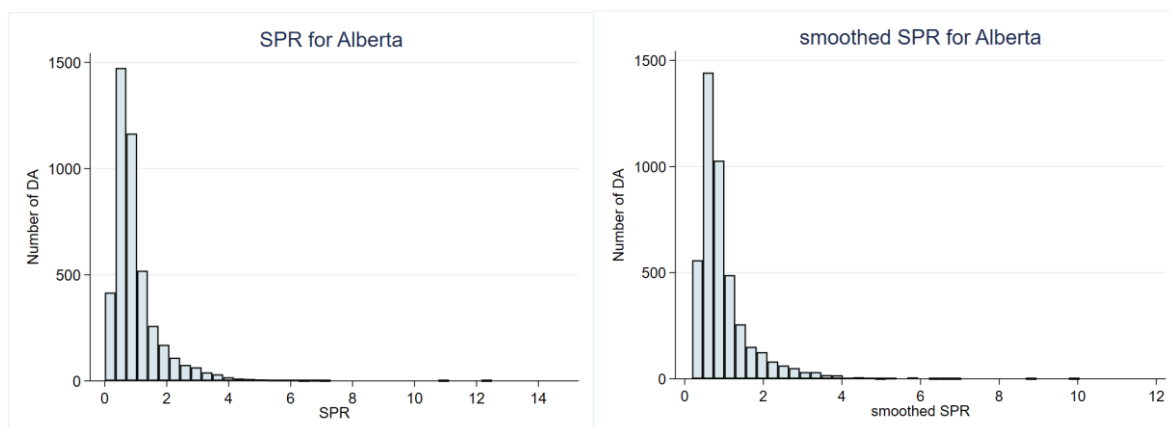

**Section S2. Moran Scatter Plots.**

Software: ESF-Tools. Technical details in: Griffith DA, Chun Y, Li B. Spatial Regression Analysis Using Eigenvector Spatial Filtering. Elsevier Academic Press. 2019. E-book. Available online: <https://doi.org/10.1016/B978-0-12-815043-6.09990-0>

Calgary. Moran Scatter Plot. Material Deprivation Quintiles

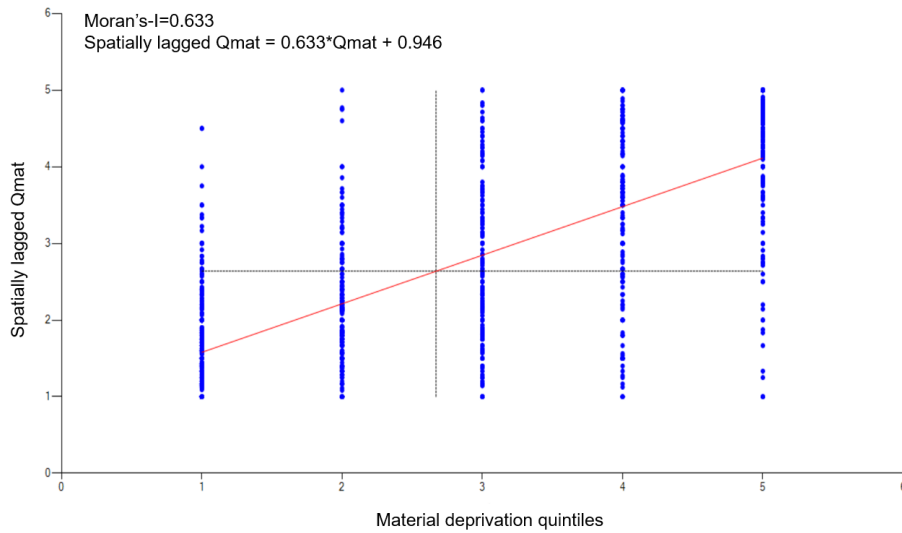

**Figure S1.** Moran scatter plot for the material deprivation quintiles, Calgary.

Calgary. Moran Scatter Plot. Social Deprivation Quintiles

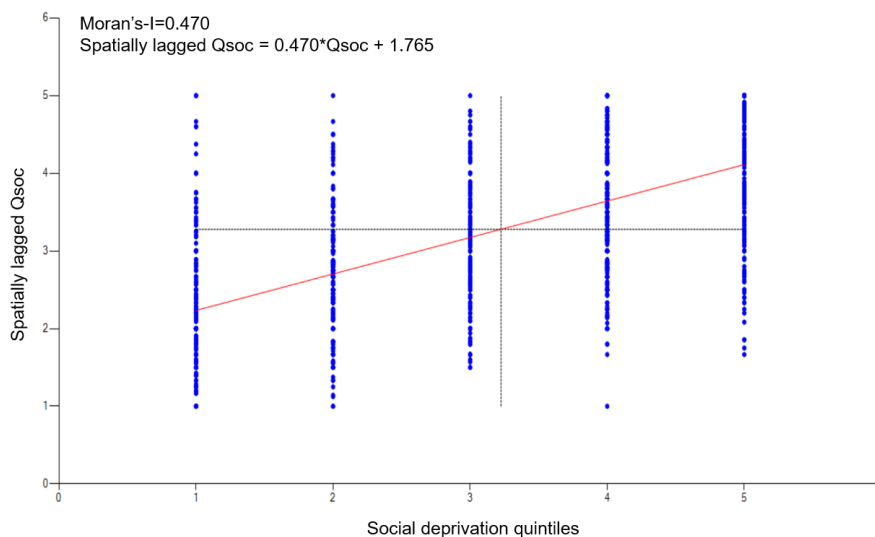

**Figure S2.** Moran scatter plot for the social deprivation quintiles, Calgary.

Calgary. Moran Scatter Plot. Smoothed SPR

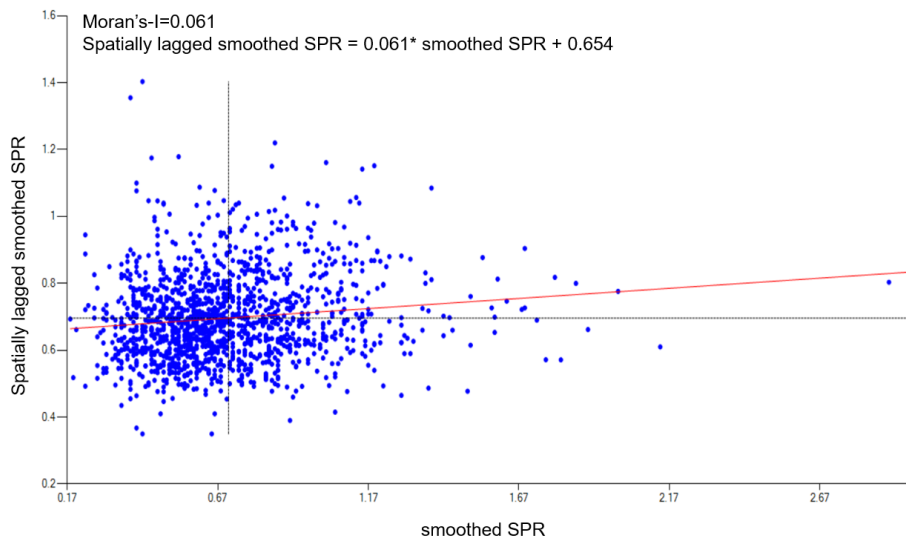

Figure S3. Moran scatter plot for the smoothed standardized prevalence ratios (SPR), Calgary.

Edmonton. Moran Scatter Plot. Material Deprivation Quintiles

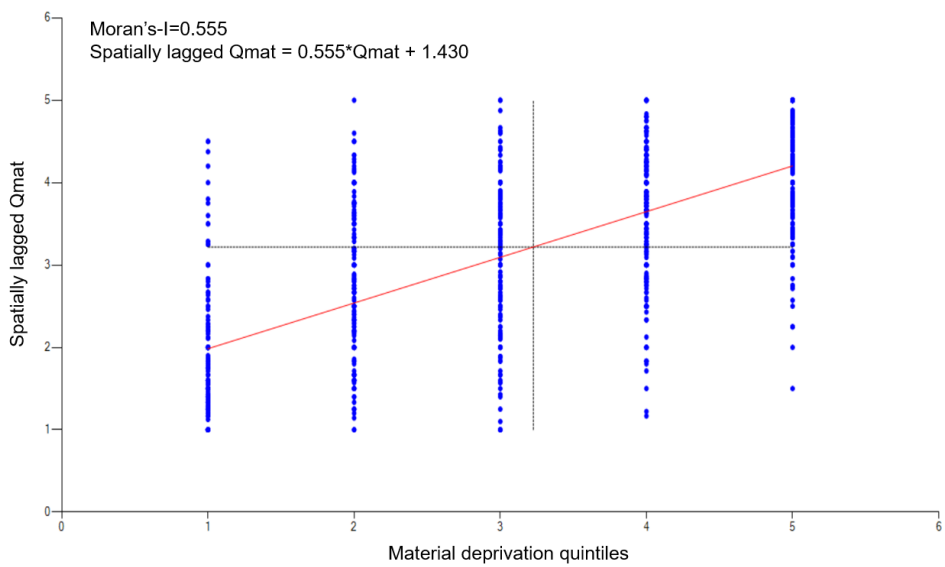

Figure S4. Moran scatter plot for the material deprivation quintiles, Edmonton.

Edmonton. Moran Scatter Plot. Social Deprivation Quintiles

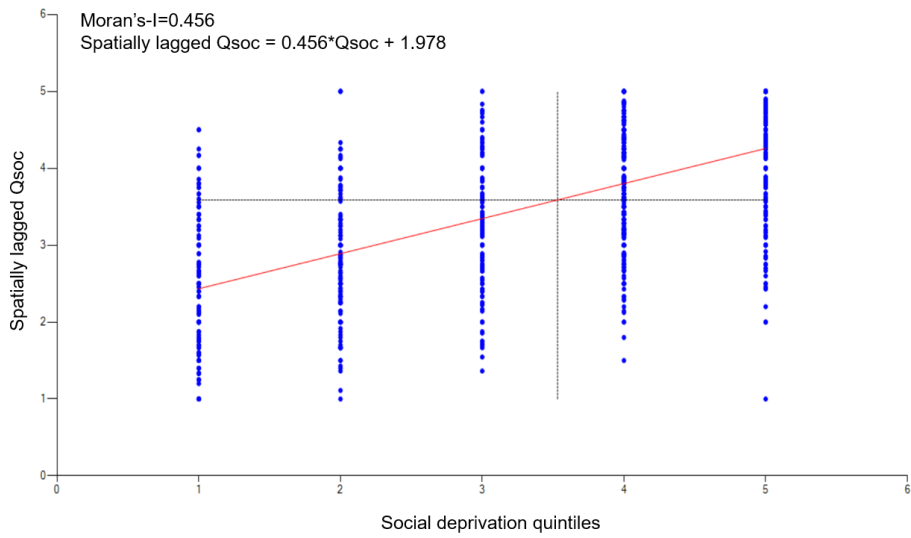

Figure S5. Moran scatter plot for the social deprivation quintiles, Edmonton.

Edmonton. Moran Scatter Plot. Smoothed SPR

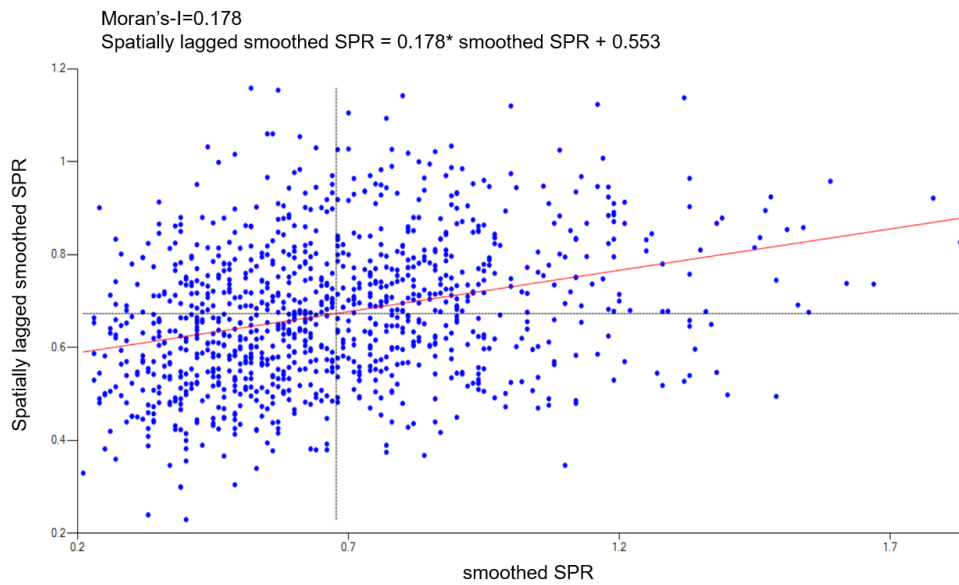

Figure S6. Moran scatter plot for the smoothed standardized prevalence ratios (SPR), Edmonton.

### Section S3. Eigenvectors related to smoothed SPR

#### Calgary:

##### Initial solution:

Extraction of Eigenvectors (EVs) related to Y (smoothed SPR).

Linear regression model (family: gaussian)

Number of rows: 1403 (= number of DAs)

Number of candidate EVs: **263**.

MC (Morans' I coefficient) of non-ESF residuals: 0.058, p-value < 0.001

AIC of non-ESF: -3,639.44, AIC of Final Model: -3,782.06

Residual standard error: 0.25 on 1348 degrees of freedom

Multiple R-squared: 0.17, Adjusted R-squared: 0.14

F-Statistic: 5.21 on 54 and 1348 DF, p-value < 0.001

MC (Morans' I coefficient) of residuals: -0.112, p-value > 0.999

Cumulative coefficient of determination (R-squared) for the first 20 eigenvectors and eigenvectors selected by changes in the increment rate of R-squared.

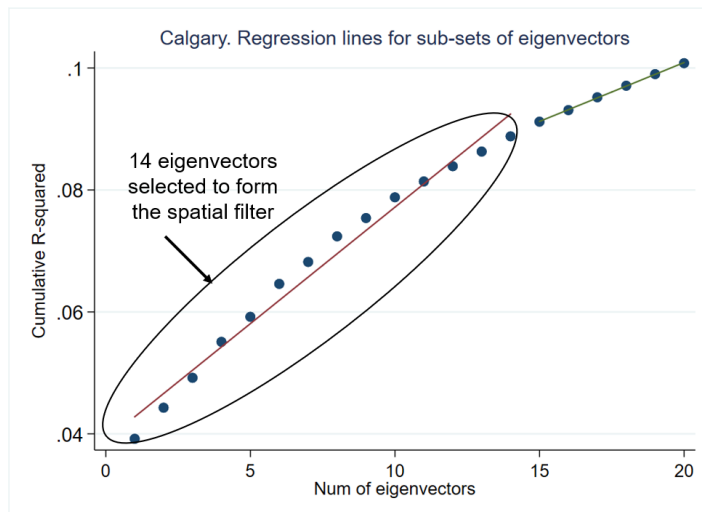

Figure S7. Cumulative R<sup>2</sup> for the first 20 selected eigenvectors, Calgary.

### Regression model for the first 20 eigenvectors (Calgary):

```
. regress bayesSIR i.qmat i.qsoc PM25 NO2 EV20 EV100 EV37 EV254 EV2 EV19 EV3 EV90 EV30 EV5 EV4 EV223
> EV34 EV89 EV220 EV13 EV101 EV165 EV29 EV15
```

| Source   | SS         | df    | MS         | Number of obs | = | 1,403  |
|----------|------------|-------|------------|---------------|---|--------|
| Model    | 12.7008123 | 30    | .423360411 | F(30, 1372)   | = | 6.24   |
| Residual | 93.1452423 | 1,372 | .067890118 | Prob > F      | = | 0.0000 |
|          |            |       |            | R-squared     | = | 0.1200 |
|          |            |       |            | Adj R-squared | = | 0.1008 |
| Total    | 105.846055 | 1,402 | .075496473 | Root MSE      | = | .26056 |

| bayesSIR | Coef.     | Std. Err. | t     | P> t  | [95% Conf. Interval] |
|----------|-----------|-----------|-------|-------|----------------------|
| qmat     |           |           |       |       |                      |
| 2        | .0328599  | .0210212  | 1.56  | 0.118 | -.0083772 .074097    |
| 3        | .0328482  | .0219468  | 1.50  | 0.135 | -.0102048 .0759011   |
| 4        | -.0062995 | .0235242  | -0.27 | 0.789 | -.0524469 .0398478   |
| 5        | .052593   | .0217882  | 2.41  | 0.016 | .0098513 .0953347    |
| qsoc     |           |           |       |       |                      |
| 2        | .0206011  | .0245187  | 0.84  | 0.401 | -.0274971 .0686993   |
| 3        | .0219702  | .023562   | 0.93  | 0.351 | -.0242513 .0681916   |
| 4        | .0291058  | .0232329  | 1.25  | 0.210 | -.01647 .0746815     |
| 5        | .0819495  | .0235883  | 3.47  | 0.001 | .0356765 .1282226    |
| PM25     | .0225614  | .0313875  | 0.72  | 0.472 | -.0390112 .0841341   |
| NO2      | -.0010719 | .0026306  | -0.41 | 0.684 | -.0062324 .0040886   |
| EV20     | 1.223901  | .2646936  | 4.62  | 0.000 | .7046534 1.74315     |
| EV100    | -.8584619 | .2634663  | -3.26 | 0.001 | -1.375302 -.3416216  |
| EV37     | .8222507  | .2645451  | 3.11  | 0.002 | .303294 1.341207     |
| EV254    | -.8402148 | .261576   | -3.21 | 0.001 | -1.353347 -.3270825  |
| EV2      | -.9035374 | .2933771  | -3.08 | 0.002 | -1.479054 -.3280212  |
| EV19     | -.8027666 | .2642613  | -3.04 | 0.002 | -1.321167 -.2843666  |
| EV3      | .7610725  | .2741106  | 2.78  | 0.006 | .2233513 1.298794    |
| EV90     | .6974374  | .2627518  | 2.65  | 0.008 | .1819986 1.212876    |
| EV30     | .6280187  | .2659737  | 2.36  | 0.018 | .1062594 1.149778    |
| EV5      | .6201274  | .2665339  | 2.33  | 0.020 | .0972692 1.142985    |
| EV4      | .5977357  | .2644727  | 2.26  | 0.024 | .0789211 1.11655     |
| EV223    | -.5885674 | .2612139  | -2.25 | 0.024 | -1.100989 -.0761454  |
| EV34     | -.5799219 | .2623382  | -2.21 | 0.027 | -1.094549 -.0652945  |
| EV89     | .5755243  | .263821   | 2.18  | 0.029 | .0579881 1.09306     |
| EV220    | .5644067  | .2617677  | 2.16  | 0.031 | .0508984 1.077915    |
| EV13     | .5586133  | .2796462  | 2.00  | 0.046 | .010033 1.107194     |
| EV101    | -.5350212 | .2613683  | -2.05 | 0.041 | -1.047746 -.0222964  |
| EV165    | -.5233198 | .2613052  | -2.00 | 0.045 | -1.035921 -.0107188  |
| EV29     | -.5153174 | .2622658  | -1.96 | 0.050 | -1.029803 -.000832   |
| EV15     | -.5054817 | .2622411  | -1.93 | 0.054 | -1.019919 -.0089552  |
| _cons    | .5153686  | .2035172  | 2.53  | 0.011 | .11613 .9146072      |

### Edmonton:

#### Initial solution:

Extraction of Eigenvectors (EVs) related to Y (smoothed SPR).

Linear regression model (family: gaussian)

Number of rows: 1038 (= number of DAs)

Number of candidate EVs: **214**.

MC (Morans'-I coefficient) of non-ESF residuals: 0.046, p-value = 0.005

AIC of non-ESF: -2,874.28, AIC of Final Model: -2,971.69

Residual standard error: 0.23 on 983 degrees of freedom

Multiple R-squared: 0.29, Adjusted R-squared: 0.25

F-Statistic: 7.35 on 54 and 983 DF, p-value < 0.001

MC (Morans'-I coefficient) of residuals: -0.108, p-value > 0.999

Cumulative coefficient of determination (R-squared) for the first 20 eigenvectors and eigenvectors selected by changes in the increment rate of R-squared.

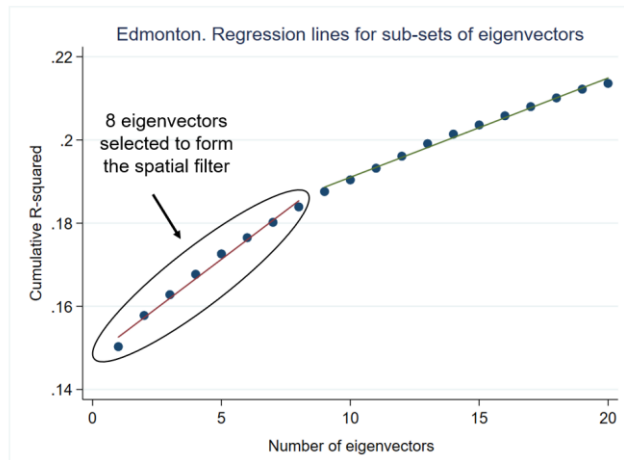

Figure S8. Cumulative R<sup>2</sup> for the first 20 selected eigenvectors, Edmonton.

Regression model for the first 20 eigenvectors (Edmonton):

```
. regress bayesSIR i.qmat i.qsoc PM25 NO2 EV2 EV17 EV9 EV55 EV50 EV22 EV15 EV184 EV67 EV194 EV139 EV
> 8 EV23 EV48 EV76 EV119 EV137 EV40 EV167 EV125
```

| Source   | SS         | df    | MS         | Number of obs | = | 1,037  |
|----------|------------|-------|------------|---------------|---|--------|
| Model    | 17.6937116 | 30    | .589790387 | F(30, 1006)   | = | 10.38  |
| Residual | 57.1514652 | 1,006 | .056810602 | Prob > F      | = | 0.0000 |
|          |            |       |            | R-squared     | = | 0.2364 |
|          |            |       |            | Adj R-squared | = | 0.2136 |
| Total    | 74.8451769 | 1,036 | .072244379 | Root MSE      | = | .23835 |

| bayesSIR | Coef.     | Std. Err. | t     | P> t  | [95% Conf. Interval] |
|----------|-----------|-----------|-------|-------|----------------------|
| qmat     |           |           |       |       |                      |
| 2        | .0883148  | .0263044  | 3.36  | 0.001 | .036697 .1399327     |
| 3        | .0863443  | .0256084  | 3.37  | 0.001 | .0360924 .1365962    |
| 4        | .1701338  | .0249313  | 6.82  | 0.000 | .1212105 .219057     |
| 5        | .186142   | .0240064  | 7.75  | 0.000 | .1390337 .2332503    |
| qsoc     |           |           |       |       |                      |
| 2        | .0543208  | .0292169  | 1.86  | 0.063 | -.0030122 .1116538   |
| 3        | .0431703  | .029035   | 1.49  | 0.137 | -.0138057 .1001464   |
| 4        | .0980844  | .0271     | 3.62  | 0.000 | .0449054 .1512635    |
| 5        | .1642038  | .0260537  | 6.30  | 0.000 | .1130779 .2153297    |
| PM25     | -.0125378 | .0111863  | -1.12 | 0.263 | -.0344889 .0094133   |
| NO2      | -.0014874 | .0027885  | -0.53 | 0.594 | -.0069594 .0039845   |
| EV2      | -1.060505 | .2614888  | -4.06 | 0.000 | -1.573631 -.5473794  |
| EV17     | -.79611   | .2575656  | -3.09 | 0.002 | -1.301538 -.2906825  |
| EV9      | .8186166  | .2645433  | 3.09  | 0.002 | .2994967 1.337737    |
| EV55     | -.6688533 | .240497   | -2.78 | 0.006 | -1.140787 -.1969201  |
| EV50     | .6575233  | .2396957  | 2.74  | 0.006 | .1871624 1.127884    |
| EV22     | .6117342  | .2419903  | 2.53  | 0.012 | .1368706 1.086598    |
| EV15     | .6091795  | .2509173  | 2.43  | 0.015 | .1167981 1.101561    |
| EV184    | -.5745379 | .240562   | -2.39 | 0.017 | -1.046599 -.1024772  |
| EV67     | -.5728051 | .2404366  | -2.38 | 0.017 | -1.04462 -.1009904   |
| EV194    | .5176566  | .2392186  | 2.16  | 0.031 | .048232 .9870813     |
| EV139    | -.5151429 | .2396536  | -2.15 | 0.032 | -.9854211 -.0448646  |
| EV8      | -.5207671 | .2436089  | -2.14 | 0.033 | -.9988069 -.0427274  |
| EV23     | .5061818  | .242903   | 2.08  | 0.037 | .0295271 .9828365    |
| EV48     | -.4874108 | .2405062  | -2.03 | 0.043 | -.9593621 -.0154595  |
| EV76     | -.4774047 | .2413736  | -1.98 | 0.048 | -.9510582 -.0037513  |
| EV119    | -.4723218 | .2391255  | -1.98 | 0.049 | -.9415637 -.00308    |
| EV137    | -.4655904 | .2395517  | -1.94 | 0.052 | -.9356687 .0044878   |
| EV40     | -.4738924 | .245184   | -1.93 | 0.054 | -.9550231 .0072383   |
| EV167    | -.4574489 | .2395661  | -1.91 | 0.056 | -.9275555 .0126577   |
| EV125    | -.405023  | .2392616  | -1.69 | 0.091 | -.8745319 .064486    |
| _cons    | .5874285  | .0954088  | 6.16  | 0.000 | .4002055 .7746516    |

#### **Section S4. Sensitivity analysis: comparison of predicted rates using queen vs. rook connectivity polygons.**

The eigenvector spatial filtering (ESF) solution depends on technical specifications at several steps. In our analysis, the connectivity matrix of dissemination areas (DA) was defined from the “queen” rule, in which DA consider neighbours if they share boundaries based on a single point (node) or a segment of border limits. Another alternative is to use the “rook” rule. In the rook connectivity, polygons are neighbours if they share a segment of border.

We estimated the predicted standardized prevalence ratios (SPR), previously smoothed by empirical Bayes estimators, for both queen and rook definitions of the connectivity matrix. Candidate eigenvectors were chosen based on positive spatial correlation considering a minimum threshold of 0.25 of the Moran’s index coefficient. The subset of eigenvectors selected to build the spatial filter, was based on maximization of  $R^2$  in the regression model. The spatial filter values were divided into quintiles. Each quintile defined a geographic zone from which we estimated the average of the smoothed SPR (and 95% CI) to quantify geographic inequalities. The results for the spatial filters according to queen and rook connectivity matrices are presented in **Table S1** for Calgary, and **Table S2** for Edmonton. No substantial differences were observed between both approaches.



**Table S1.** Predicted standardized prevalence ratios (SPR) for both queen and rook definitions of the connectivity matrix in Calgary.

| Spatial Filter<br>(quintiles) | Queen connectivity |              | Rook connectivity |              |
|-------------------------------|--------------------|--------------|-------------------|--------------|
|                               | Predicted<br>SPR   | 95% CI       | Predicted<br>SPR  | 95% CI       |
| 1                             | 0.58               | (0.55, 0.61) | 0.59              | (0.55, 0.62) |
| 2                             | 0.65               | (0.62, 0.68) | 0.62              | (0.59, 0.65) |
| 3                             | 0.69               | (0.66, 0.72) | 0.70              | (0.67, 0.73) |
| 4                             | 0.75               | (0.72, 0.78) | 0.76              | (0.73, 0.79) |
| 5                             | 0.87               | (0.83, 0.90) | 0.87              | (0.84, 0.90) |

CI = confidence interval; SPR = standardized prevalence ratios

**Table S2.** Predicted standardized prevalence ratios (SPR) for both queen and rook definitions of the connectivity matrix in Edmonton.

| Spatial Filter<br>(quintiles) | Queen connectivity |              | Rook connectivity |              |
|-------------------------------|--------------------|--------------|-------------------|--------------|
|                               | Predicted<br>SPR   | 95% CI       | Predicted<br>SPR  | 95% CI       |
| 1                             | 0.57               | (0.54, 0.61) | 0.54              | (0.50, 0.57) |
| 2                             | 0.60               | (0.57, 0.64) | 0.61              | (0.58, 0.64) |
| 3                             | 0.68               | (0.64, 0.71) | 0.65              | (0.62, 0.68) |
| 4                             | 0.74               | (0.71, 0.78) | 0.72              | (0.69, 0.75) |
| 5                             | 0.79               | (0.76, 0.82) | 0.87              | (0.84, 0.90) |

CI = confidence interval; SPR = standardized prevalence ratios

Section S5. Maps of air pollutant concentrations. Nitrogen Dioxide (NO<sub>2</sub>) and fine Particulate Matter (PM<sub>2.5</sub>).

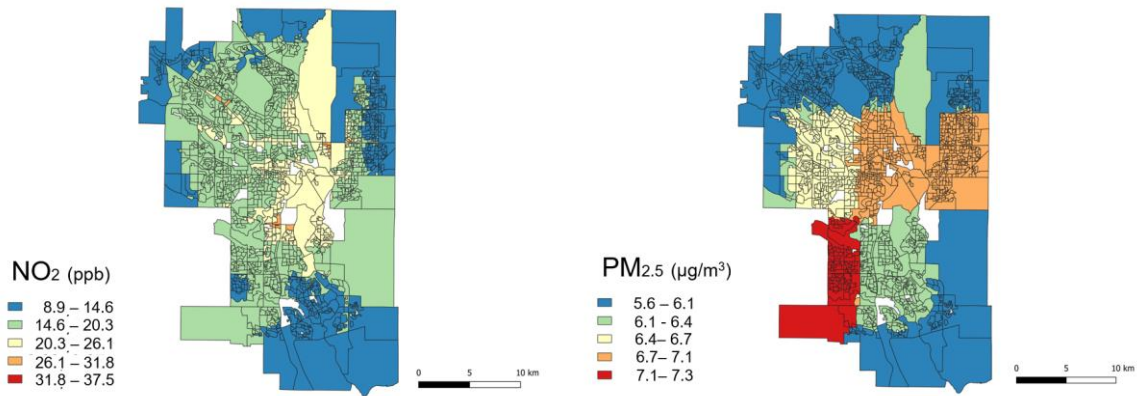

Figure S9. Air pollutant concentrations for NO<sub>2</sub> and PM<sub>2.5</sub> in Calgary.

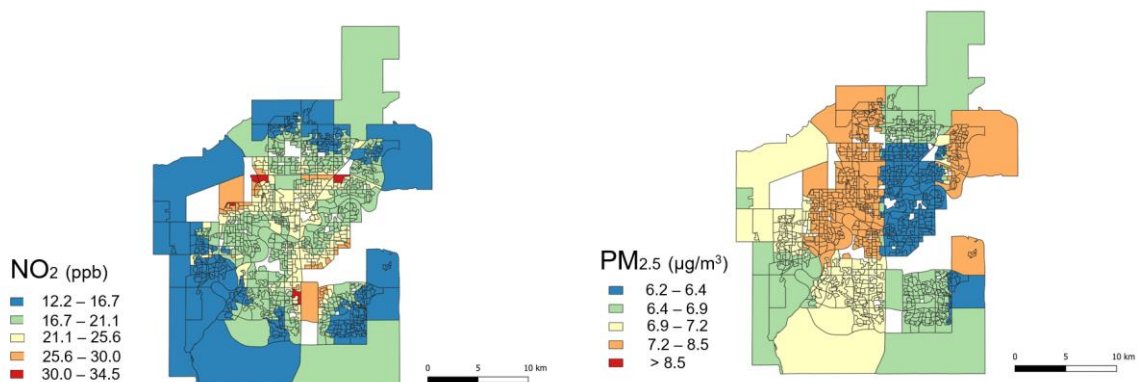

Figure S10. Air pollutant concentrations for NO<sub>2</sub> and PM<sub>2.5</sub> in Edmonton.

Air pollutant concentrations were reported by Hystad P, Setton E, Cervantes A, Poplawski K, Deschenes S, Brauer M, et al. Creating national air pollution models for population exposure assessment in Canada. *Environ. Health Perspect.* 2011;119:1123–1129. <https://doi.org/10.1289/ehp.1002976>
